# Supplementary material for: Isotropic Contact Properties in Monolayer GeAs Field-Effect Transistors
Source: MDPI journal article supplement (doi:10.3390/molecules28237806), 2023-11-27
Supplement: s1 [file s1]

# Isotropic Contact Properties in Monolayer GeAs Field-Effect Transistors

Weiqi Song <sup>1</sup>, Haosong Liu <sup>2</sup>, Feihu Zou <sup>1</sup>, Yize Niu <sup>1</sup>, Yue Zhao <sup>1</sup>, Yao Cong <sup>2</sup>, Yuanyuan Pan <sup>1,\*</sup> and Qiang Li <sup>1,\*</sup>

<sup>1</sup> College of Physics, Center for Marine Observation and Communications, Qingdao University, Qingdao 266071, China; 2021020281@qdu.edu.cn (W.S.); 2021020280@qdu.edu.cn (F.Z.); 2022025400@qdu.edu.cn (Y.N.); zhaoyue69@qdu.edu.cn (Y.Z.)

<sup>2</sup> State Key Laboratory of Heavy Oil Processing, Institute of New Energy, College of Chemical Engineering, China University of Petroleum (East China), Qingdao 266580, China; lhs\_upc@163.com (H.L.); cong\_y1217@163.com (Y.C.)

\* Correspondence: panyy@qdu.edu.cn (Y.P.); liqiang@qdu.edu.cn (Q.L.)

**Table S1.** Lattice constants of ML GeAs and independent 2D metal electrodes (graphene, Ti<sub>2</sub>CF<sub>2</sub>, V<sub>2</sub>CF<sub>2</sub>, and Ti<sub>3</sub>C<sub>2</sub>O<sub>2</sub>) and the Cu metal electrode.

|              | ML<br>GeAs | graphene | Ti <sub>2</sub> CF <sub>2</sub> | V <sub>2</sub> CF <sub>2</sub> | Ti <sub>3</sub> C <sub>2</sub> O <sub>2</sub> | Cu   |
|--------------|------------|----------|---------------------------------|--------------------------------|-----------------------------------------------|------|
| <i>a</i> (Å) | 22.25      | 2.46     | 3.04                            | 2.99                           | 3.04                                          | 2.55 |
| <i>b</i> (Å) | 3.82       | 2.46     | 2.63                            | 2.99                           | 2.68                                          | 2.55 |
